# Supplementary material for: Palladium cluster complex [Pd13(μ4-C7H7)6]2+ (C7H7 = tropylium) with an fcc-close-packed cuboctahedral Pd13 core and isomers: theoretical insight into ligand-control of the Pd13 core structure
Source: Royal Society of Chemistry journal article supplement (doi:10.1039/d3cp03262k), 2023-01-01
Supplement: d3cp03262k1.pdf [file d3cp03262k1.pdf]

**Electronic Supplementary Information (ESI)**

**Palladium cluster complex  $[\text{Pd}_{13}(\mu_4\text{-C}_7\text{H}_7)_6]^{2+}$  ( $\text{C}_7\text{H}_7 = \text{Tropylium}$ ) with *fcc*-close-packed cuboctahedral  $\text{Pd}_{13}$  core and isomers: Theoretical insight into ligand-control of  $\text{Pd}_{13}$  core structure**

Bo Zhu,<sup>1</sup> Tetsuro Murahashi,<sup>2\*</sup> and Shigeyoshi Sakaki<sup>3\*</sup>

<sup>1</sup> *Institute of Functional Materials Chemistry, Faculty of Chemistry, Northeast Normal University, Changchun 130024, P. R. China*

<sup>2</sup> *Department of Chemical Science and Engineering, School of Materials and Chemical Technology, Tokyo Institute of Technology O-okayama, Meguro-ku, Tokyo 152-8552, Japan*

<sup>3</sup> *Institute for Integrated Cell-Material Sciences, Rohm Plaza R312, Kyoto University, Kyoto-Daigaku Katsura, Nishikyo-ku, Kyoto 615-8246, Japan*

E-mails: mura@apc.titech.ac.jp  
sakaki.shigeyoshi.47e@st.kyoto-u.ac.jp

## Contents

|                                                                                                                                                                                                   |     |
|---------------------------------------------------------------------------------------------------------------------------------------------------------------------------------------------------|-----|
| 1. Optimized Pd-Pd distances (in Å) in $[\text{Pd}_{13}(\mu_4\text{-C}_7\text{H}_7)_6]^{2+}$ cuboctahedral $\text{Pd}_{13}$ core and their comparisons with experimental values (Table S1) -----  | S3  |
| 2. Atomic charges (NBO charges and Hirshfeld charges) of $[\text{Pd}_{13}(\text{C}_7\text{H}_7)_6]^{2+}$ cuboctahedral and anti-cuboctahedral $\text{Pd}_{13}$ core (Table S2 and Figure S1)----- | S4  |
| 3. Frontier orbitals of anti-cuboctahedral $\text{Pd}_{13}$ cores (Scheme S1) -----                                                                                                               | S6  |
| 4. Frontier orbitals of icosahedral $\text{Pd}_{13}$ cores (Scheme S2) -----                                                                                                                      | S7  |
| 5. HOMO and LUMO of $[(\text{C}_7\text{H}_7)_6]^{2+}$ of each $\text{C}_7\text{H}_7$ at the closed shell singlet (Scheme S3) -----                                                                | S8  |
| 6. Six singly occupied molecular orbitals (SOMOs) of $[(\text{C}_7\text{H}_7)_6]$ in the septet state (Scheme S4) -----                                                                           | S9  |
| 7. Discussion of Closed-shell singlet state of the $[(\text{C}_7\text{H}_7)_6]^{2+}$ ligand shell-----                                                                                            | S10 |
| 8. HOMO, HOMO-1, HOMO-2 of cuboctahedral and anti-cuboctahedral $\text{Pd}_{13}$ clusters without ligand (Scheme S5)-----                                                                         | S11 |
| 9. Comparison between <b>Anti-<math>\mu_3,4</math></b> and <b>Anti-<math>\mu_4</math></b> and <b>between Ih-<math>\mu_3</math></b> and <b>Cubo-<math>\mu_3</math></b> --                          | S12 |
| 10. References -----                                                                                                                                                                              | S14 |
| 11. Cartesian coordinate -----                                                                                                                                                                    | S15 |

**Table S1.** Optimized Pd-Pd distances (in Å) in  $[\text{Pd}_{13}(\mu_4\text{-C}_7\text{H}_7)_6]^{2+}$  cubooctahedral  $\text{Pd}_{13}$  core and their comparisons with experimental values.

| <b>Bonds</b>                                                                 | <b><math>[\text{Pd}_{13}(\text{C}_7\text{H}_7)_6]^{2+}</math></b> |                  |                                           |
|------------------------------------------------------------------------------|-------------------------------------------------------------------|------------------|-------------------------------------------|
|                                                                              | <b>Exp. <sup>b</sup></b>                                          | <b>This work</b> | <b><math> \Delta </math> <sup>c</sup></b> |
| <b><math>\text{Pd}^{\text{C}}\text{-Pd}^{\text{T/B}}</math> <sup>a</sup></b> | 2.769                                                             | 2.742            | 0.027                                     |
| <b><math>\text{Pd}^{\text{C}}\text{-Pd}^{\text{E}}</math></b>                | 2.766                                                             | 2.738            | 0.028                                     |
| <b><math>\text{Pd}^{\text{T/B}}\text{-Pd}^{\text{E}}</math></b>              | 2.766                                                             | 2.740            | 0.026                                     |
| <b><math>\text{Pd}^{\text{E}}\text{-Pd}^{\text{E}}</math></b>                | 2.766                                                             | 2.738            | 0.028                                     |
| <b><math>\text{Pd}^{\text{T/B}}\text{-Pd}^{\text{T/B}}</math></b>            | 2.764                                                             | 2.746            | 0.018                                     |
|                                                                              | <b>Exp. <sup>b</sup></b>                                          | <b>This work</b> | <b>Previous work <sup>d</sup></b>         |
| <b>Longest Pd-Pd</b>                                                         | 2.737                                                             | 2.836            | 2.900                                     |
| <b>Shortest Pd-Pd</b>                                                        | 2.631                                                             | 2.688            | 2.718                                     |
| <b>Average</b>                                                               | 2.716                                                             | 2.767            | 2.808                                     |

<sup>a</sup>  $\text{Pd}^{\text{C}}$ ,  $\text{Pd}^{\text{E}}$ , and  $\text{Pd}^{\text{T/B}}$  represent Pd atoms at a center, equatorial, and top (or bottom) three-member ring, respectively. Mean value of Pd-Pd distances in each category is presented here because the unique comparison between the optimized geometry and the experimental one is difficult due to various orientations.

<sup>b</sup> Ref. S1.

<sup>c</sup> This is the absolute value of difference between the optimized Pd-Pd distance and the experimental one.

<sup>d</sup> Ref. S2.

**Brief discussion:** Generally, the DFT-optimized bond-distance of mono-nuclear transition metal complexes with a medium size does not deviate very much from experimental value (less than 0.3 Å to 0.5 Å in many cases). Here, the deviation of the longest Pd-Pd bond seems too large, whereas the average of Pd-Pd distances agree with experimental values. However, the flexibility and large size of this  $\text{Pd}_{13}$  cluster complex are the obstacle for geometry optimization. Nevertheless, the agreement with the experimental geometry is considerably better than that optimized previously (ref. S2). It is likely to state that the present DFT calculation overestimates Pd-Pd distances but the agreement is not bad, taking the large size and flexibility of the geometry of the  $\text{Pd}_{13}$  cluster complex.

**Table S2.** Atomic charge of  $[\text{Pd}_{13}(\text{C}_7\text{H}_7)_6]^{2+}$  cuboctahedral and anticuboctahedral  $\text{Pd}_{13}$  core.

| $[\text{Pd}_{13}(\mu_4\text{-C}_7\text{H}_7)_6]^{2+}$ (Cubo; $\mu 4$ ) |                                    |                                    |                                      |                                                |
|------------------------------------------------------------------------|------------------------------------|------------------------------------|--------------------------------------|------------------------------------------------|
|                                                                        | <b>Pd<sup>C</sup></b> <sup>a</sup> | <b>Pd<sup>E</sup></b> <sup>a</sup> | <b>Pd<sup>T/B</sup></b> <sup>a</sup> | <b>C<sub>7</sub>H<sub>7</sub></b> <sup>a</sup> |
| <b>NBO<sup>a</sup></b>                                                 | -0.517                             | 0.085                              | 0.085                                | 0.249                                          |
| <b>Hirshfeld<sup>a</sup></b>                                           | -0.064                             | 0.081                              | 0.081                                | 0.181                                          |
| <b>Mulliken<sup>b</sup></b>                                            | 4.42                               | -0.498                             | -0.498                               | 0.593                                          |
| $[\text{Pd}_{13}(\mu_4\text{-C}_7\text{H}_7)_6]^{2+}$ (Anti; $\mu 4$ ) |                                    |                                    |                                      |                                                |
|                                                                        | <b>Pd<sup>C</sup></b>              | <b>Pd<sup>E</sup></b>              | <b>Pd<sup>T/B</sup></b>              | <b>C<sub>7</sub>H<sub>7</sub></b>              |
| <b>NBO<sup>a</sup></b>                                                 | -0.774                             | 0.131                              | 0.099                                | 0.232                                          |
| <b>Hirshfeld<sup>a</sup></b>                                           | -0.056                             | 0.043                              | 0.097                                | 0.203                                          |
| <b>Mulliken<sup>b</sup></b>                                            | 4.761                              | -0.472                             | -0.547                               | 0.559                                          |

<sup>a</sup> Pd<sup>C</sup>, Pd<sup>E</sup>, and Pd<sup>T/B</sup> represent Pd atoms at a center, equatorial, and top (or bottom) three-member ring, respectively.

<sup>b</sup> Because the Mulliken population analysis leads to unusual atomic charge when diffuse basis functions are involved, we here employed double-zeta quality basis sets for Pd and other atoms; LANL2DZ was used for Pd and 6-31G(d) were used for other atoms.

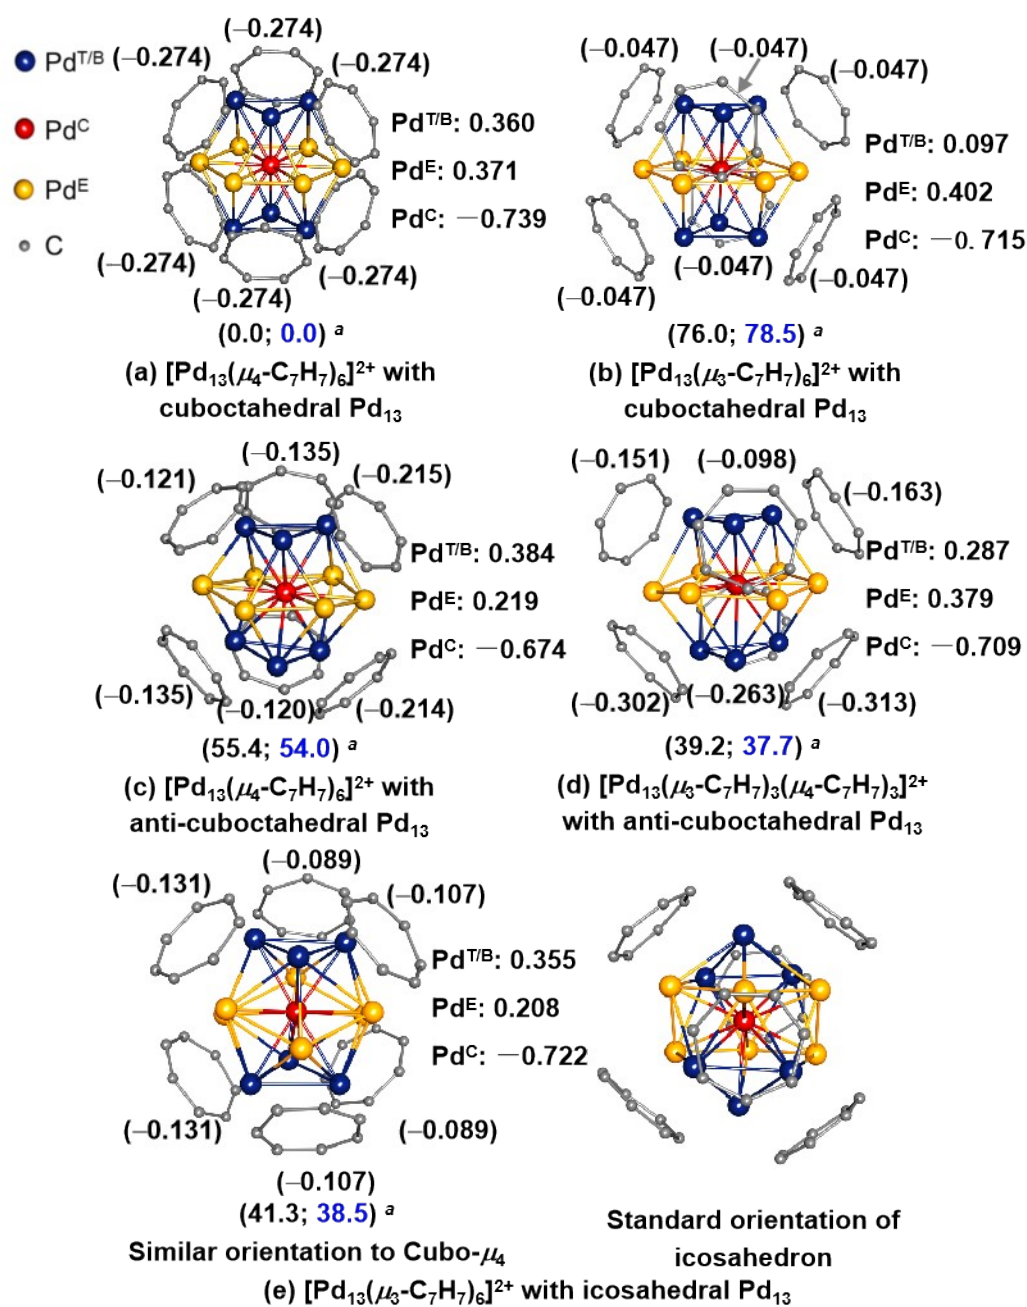

**Figure S2.** NBO charges (in  $e$  unit) of  $[\text{Pd}_{13}(\mu_4\text{-C}_7\text{H}_7)_6]^{2+}$  with a cubo-octahedral  $\text{Pd}_{13}$  core **Cubo- $\mu_4$**  (a),  $[\text{Pd}_{13}(\mu_3\text{-C}_7\text{H}_7)_6]^{2+}$  with a cubo-octahedral  $\text{Pd}_{13}$  core **Cubo- $\mu_3$**  (b),  $[\text{Pd}_{13}(\mu_4\text{-C}_7\text{H}_7)_6]^{2+}$  with an anticubo-octahedral  $\text{Pd}_{13}$  core **Anti- $\mu_4$**  (c),  $[\text{Pd}_{13}(\mu_3\text{-C}_7\text{H}_7)_3(\mu_4\text{-C}_7\text{H}_7)_3]^{2+}$  with an anticubo-octahedral  $\text{Pd}_{13}$  core **Anti- $\mu_3,4$**  (d) and  $[\text{Pd}_{13}(\mu_3\text{-C}_7\text{H}_7)_6]^{2+}$  with an icosahedral  $\text{Pd}_{13}$  core **Ih- $\mu_3$**  (e). <sup>a</sup>Relative potential energy and Gibbs energy (in kcal/mol) relative to those of  $[\text{Pd}_{13}(\mu_4\text{-C}_7\text{H}_7)_6]^{2+}$  with a cubo-octahedral  $\text{Pd}_{13}$  core.

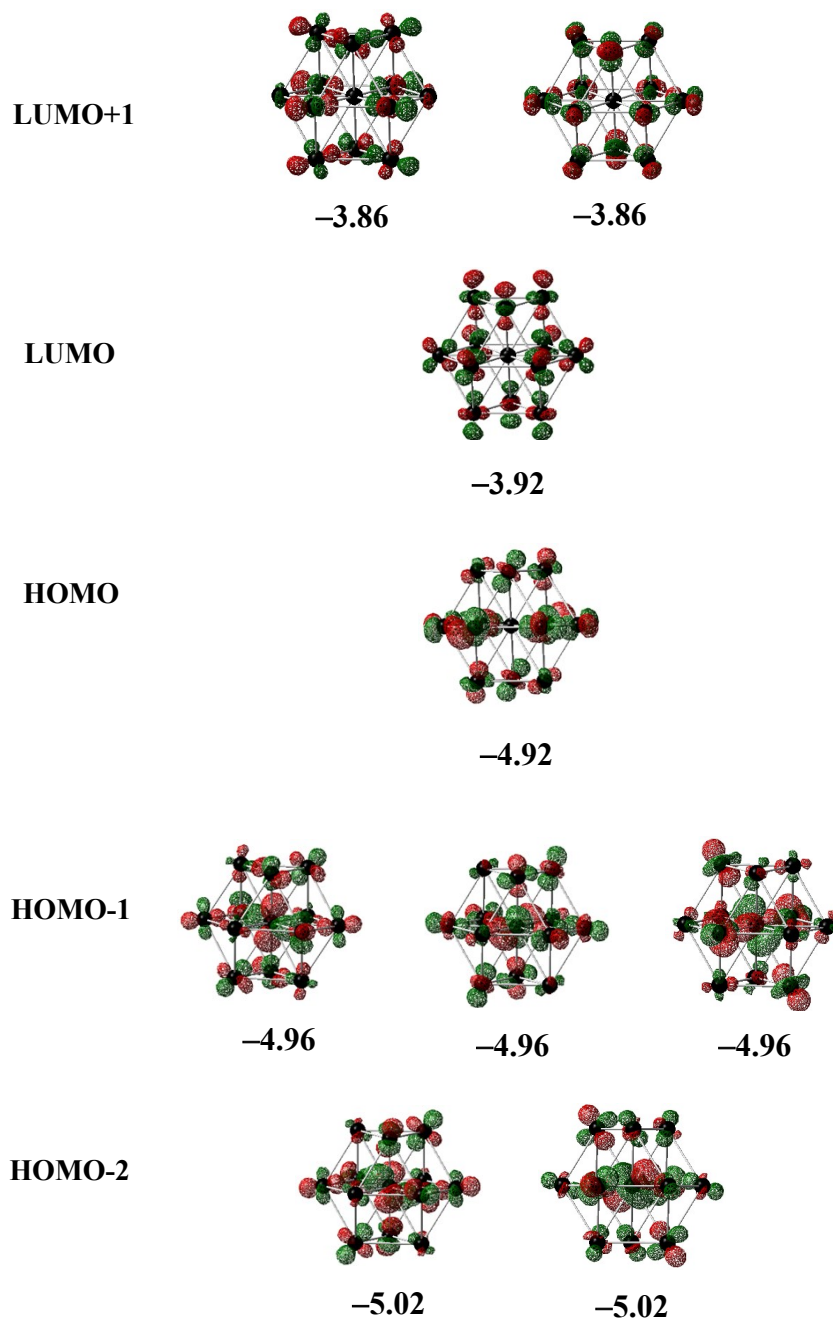

**Scheme S1.** Frontier orbitals of anticuboctahedral Pd<sub>13</sub> cores, where the geometry was optimized. The number below each MO represents the Kohn-Sham orbital energy (in eV). B3PW91-D3(BJ)/BS-II was used here.<sup>S3</sup>

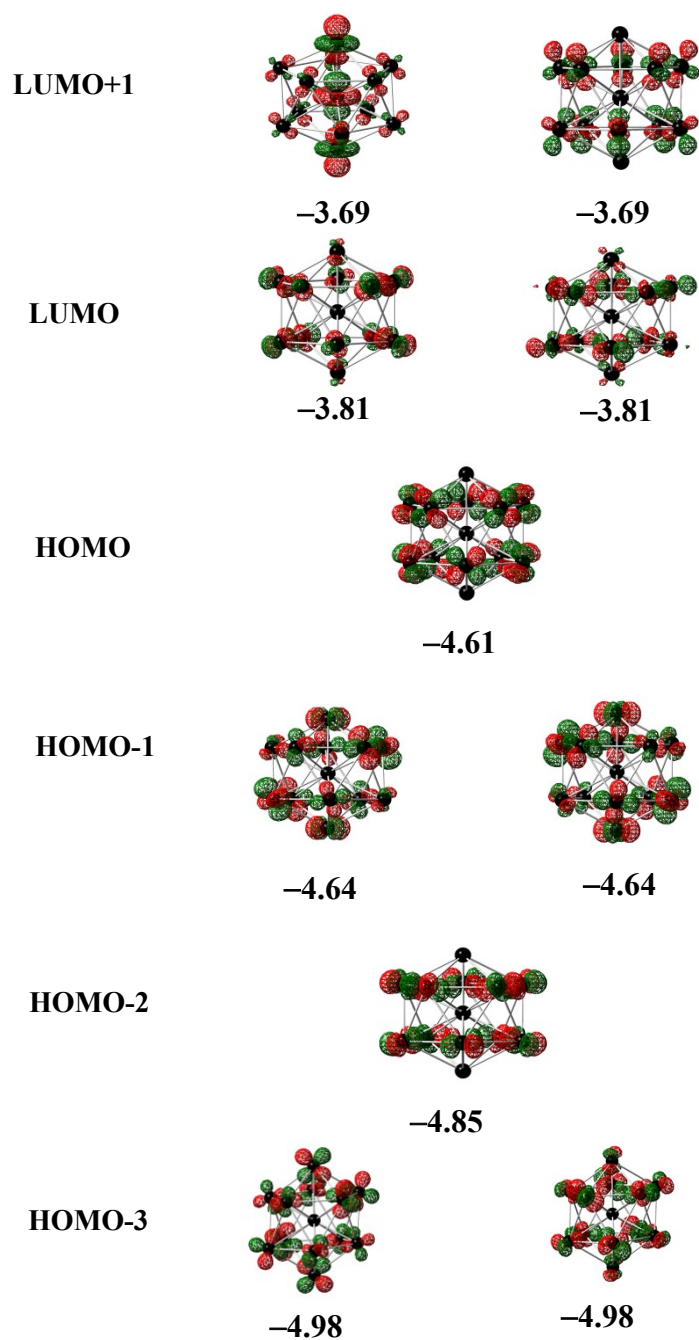

**Scheme S2.** Frontier orbitals of icosahedral Pd<sub>13</sub> cores, where the geometry was optimized. The number below each MO represents the Kohn-Sham orbital energy (in eV). B3PW91-D3(BJ)/BS-II was used here.<sup>S3</sup>

**Discussion:** These Schemes 1 and 2 mean that both the neutral Pd<sub>13</sub> and the [Pd<sub>13</sub>]<sup>2+</sup> clusters can have anticuboctahedral and icosahedral structures at the closed shell singlet state; because both have non-degenerate HOMO, the [Pd<sub>13</sub>]<sup>2+</sup> cluster does not induce the Jahn-Teller distortion.

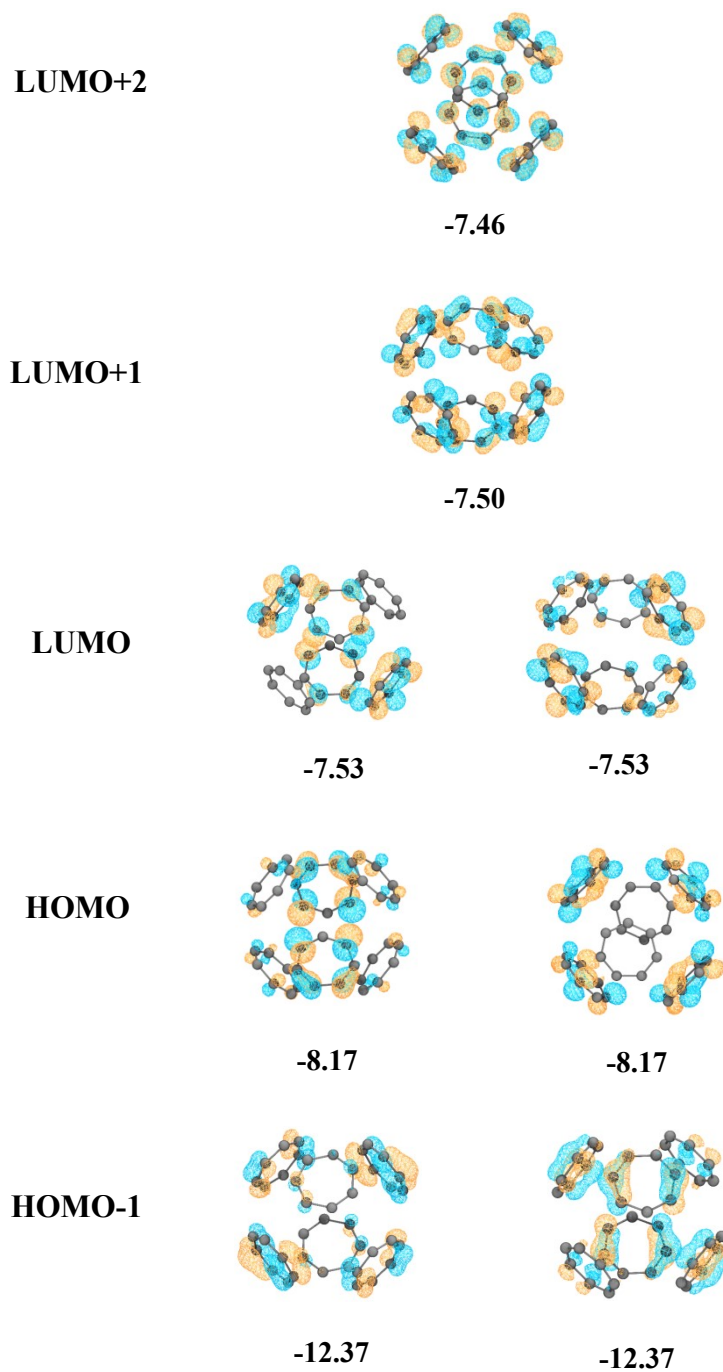

**Scheme S3.** HOMO and LUMO of  $[(C_7H_7)_6]^{2+}$  at the closed shell singlet, where the geometry is taken to be the same as that in  $[Pd_{13}(\mu_4-C_7H_7)_6]^{2+}$  with cuboctahedral  $Pd_{13}$  core. The number below each MO represents the Kohn-Sham orbital energy (in eV). B3PW91-D3(BJ)/BS-I was used here, because BS-II presents overly diffuse features of MO.



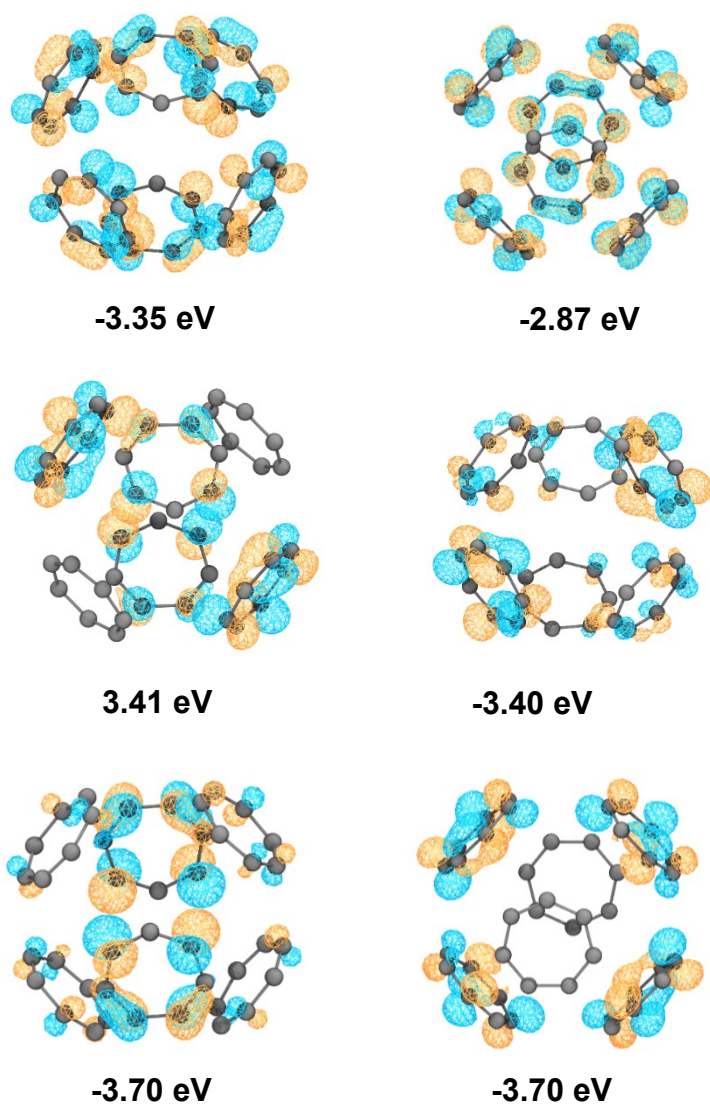

**Scheme S4.** Six singly occupied molecular orbitals (SOMOs) of  $[(C_7H_7)_6]$  in the septet state, where geometries, positions, and orientations of six  $C_7H_7$  molecules are taken to be the same as those in  $[Pd_{13}(C_7H_7)]^{2+}$  with a cuboctahedral  $Pd_{13}$  core.

B3PW91-D3(BJ)/BS-I was used here, because BS-II presents overly diffuse features of MO.

**Discussion:** The two MOs at lower energy (-3.70 eV) than the other four MOs become doubly occupied HOMO in the  $[(C_7H_7)_6]^{2+}$  at the closed shell singlet, as shown in Scheme S3.

### Discussion of closed-shell singlet state of the $[(C_7H_7)_6]^{2+}$ ligand shell

When six neutral  $C_7H_7$  molecules are separated well from each other, there exist six singly occupied molecular orbitals (SOMOs) at the same orbital energy in the septet spin state. When the  $[(C_7H_7)_6]^{2+}$  system is calculated at the closed-shell singlet state, two of them are doubly occupied. Such an electronic structure may cause significantly large distortion in the  $[(C_7H_7)_6]^{2+}$  moiety due to the Jahn-Teller effect and the six  $C_7H_7$  molecules become non-equivalent. This is not suitable for the nearly octahedral  $(C_7H_7)_6$  ligand shell. To check whether the closed shell singlet state of the  $[(C_7H_7)_6]^{2+}$  ligand shell is reasonable or not, we calculated the neutral  $[(C_7H_7)_6]$  ligand shell at the septet spin state, where the geometry was taken to be the same as that in **Cubo- $\mu$ 4**. The neutral  $[(C_7H_7)_6]$  system has six SOMOs at the septet state as expected, as shown in Scheme S4 of the Supporting Information. However, their orbital energies are not the same unexpectedly; two of them are calculated at lower energies than the other four SOMOs probably because six  $C_7H_7$  molecules are not completely isolated but interact to some extent with each other in the ligand shell of **Cubo- $\mu$ 4**. Consequently, those two MOs at a lower energy become a doubly-degenerated HOMO in the  $[(C_7H_7)_6]^{2+}$  system at a closed shell singlet state, as shown in Scheme S3 of the Electronic Supplementary Information (ESI). Thus, there is no unreasonable feature in the  $[(C_7H_7)_6]^{2+}$  ligand shell having the closed shell singlet state when the geometry is taken to be the same as that in **Cubo- $\mu$ 4**.

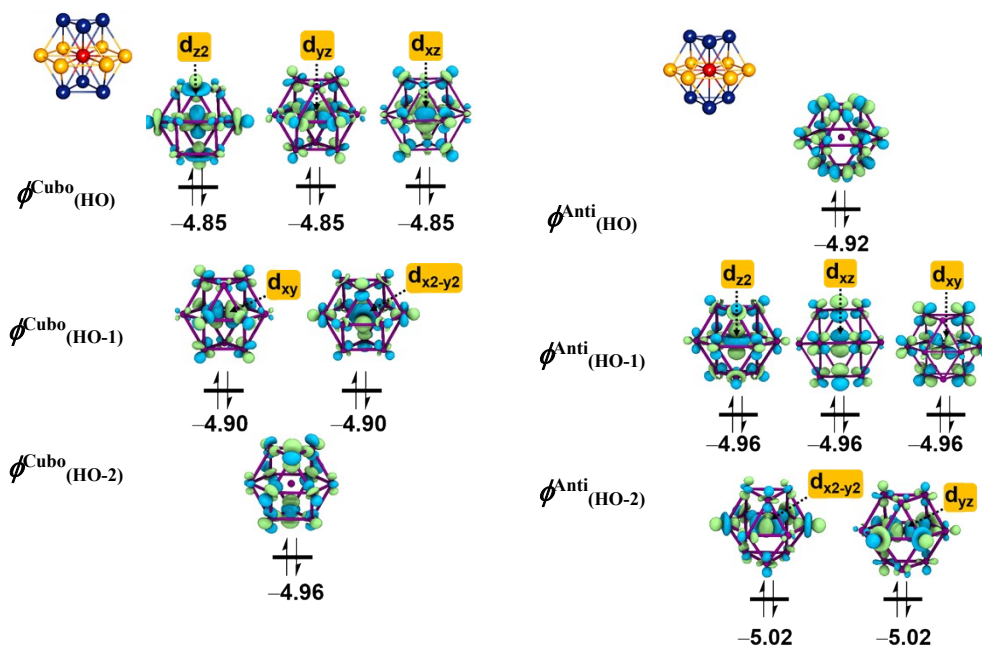

**Scheme S5.** The HOMO, HOMO-1, HOMO-2 of cubo-octahedral and anti-cubo-octahedral Pd<sub>13</sub> clusters<sup>S3</sup>

<sup>a</sup> The optimized geometries of cubo-octahedral and anti-cubo-octahedral Pd<sub>13</sub> clusters were employed. B3PW91-D3(BJ)/BS-II was used.

**Discussion:** The HOMO  $\phi^{\text{Anti}}(\text{HO})$  of the anti-cubo-octahedral Pd<sub>13</sub> corresponds to the HOMO-2  $\phi^{\text{Cubo}}(\text{HO-2})$  of the cubo-octahedral Pd<sub>13</sub>, as shown in Scheme S5, but their energies do not differ very much. The HOMO-1  $\phi^{\text{Anti}}(\text{HO-1})$  and HOMO-2  $\phi^{\text{Anti}}(\text{HO-2})$  of the anti-cubo-octahedral Pd<sub>13</sub> correspond to the HOMO  $\phi^{\text{Cubo}}(\text{HO})$  and HOMO-1  $\phi^{\text{Cubo}}(\text{HO-1})$  of the cubo-octahedral Pd<sub>13</sub>, respectively. However, the  $\phi^{\text{Anti}}(\text{HO-1})$  and  $\phi^{\text{Anti}}(\text{HO-2})$  exist at somewhat lower energies than the  $\phi^{\text{Cubo}}(\text{HO})$  and  $\phi^{\text{Cubo}}(\text{HO-1})$ , respectively. As a result,  $\phi^{\text{Anti}}(\text{HO})$  becomes the HOMO of the anti-cubo-octahedral Pd<sub>13</sub> cluster despite that it resembles  $\phi^{\text{Cubo}}(\text{HO-2})$  of the cubo-octahedral Pd<sub>13</sub>. The orbital energy differences between  $\phi^{\text{Cubo}}(\text{HO})/\phi^{\text{Cubo}}(\text{HO-1})$  of the cubo-octahedral Pd<sub>13</sub> and  $\phi^{\text{Anti}}(\text{HO-1})/\phi^{\text{Anti}}(\text{HO-2})$  of the anti-cubo-octahedral Pd<sub>13</sub> may result from the extent of the d orbital participation of the Pd<sup>C</sup> atom in these MOs but the details are not clear at the present stage. Further analysis is needed.

## 9. Comparisons between Anti- $\mu_3,4$ and Anti- $\mu_4$ and between Ih- $\mu_3$ and Cubo- $\mu_3$

**9.1 Comparison between Anti- $\mu_3,4$  and Anti- $\mu_4$ .** As shown in Figure 2, **Anti- $\mu_3,4$**  is more stable than **Anti- $\mu_4$** , which mainly results from the more negative  $E_{\text{int}}$  value in **Anti- $\mu_3,4$**  than in **Anti- $\mu_4$**  (Table 2). The larger stability of **Anti- $\mu_3,4$**  than that of **Anti- $\mu_4$**  is seemingly inconsistent with the conclusion above showing that the  $\mu_4$ -coordination bond of  $C_7H_7$  is stronger in **Cubo- $\mu_4$**  than the  $\mu_3$ -one in **Cubo- $\mu_3$** .

In **Anti- $\mu_3,4$** , the  $\mu_4$ - $C_7H_7$  ligand is less positively charged (average value = +0.156  $e$ ) than the  $\mu_3$ - $C_7H_7$  ligand (average value = +0.224  $e$ ), suggesting that the CT from the  $Pd_{13}$  core to the  $\mu_4$ - $C_7H_7$  ligand is stronger than that to the  $\mu_3$ - $C_7H_7$  ligand like in **Cubo- $\mu_3$**  and **Cubo- $\mu_4$** . Consistent with this difference in CT, the  $R(Pd^C-X)$  distance (1.976 Å; Table 1) of **Anti- $\mu_3,4$**  is considerably shorter in the  $\mu_4$ -coordination bond than in the  $\mu_3$ -one (2.238 Å). In **Anti- $\mu_4$** , however, the  $R(Pd^C-X)$  distance (2.230 Å) is considerably longer than that (1.976 Å) of the  $\mu_4$ -coordination of **Anti- $\mu_3,4$**  and the averaged charge (+0.203  $e$ ) of six  $\mu_4$ - $C_7H_7$  ligands in **Anti- $\mu_4$**  is larger than that (+0.156  $e$ ) of three  $\mu_4$ - $C_7H_7$  ligands in **Anti- $\mu_3,4$** . These features suggest that the  $\mu_4$ -coordination is much stronger and, therefore, the  $E_{\text{int}}$  is larger in **Anti- $\mu_3,4$**  than in **Anti- $\mu_4$** . This is the reason why **Anti- $\mu_3,4$**  is more stable than **Anti- $\mu_4$**  despite that **Anti- $\mu_3,4$**  has three  $\mu_3$ - and three  $\mu_4$ -coordination bonds of  $C_7H_7$  but **Anti- $\mu_4$**  has six  $\mu_4$ -coordination bonds.

In the above explanation, we address a new open question why the  $\mu_4$ -coordination bond is weaker in **Anti- $\mu_4$**  than in **Anti- $\mu_3,4$** . We compared the positions of  $C_7H_7$  ligands between **Anti- $\mu_4$**  and **Anti- $\mu_3,4$** . In **Anti- $\mu_4$** , three  $\mu_4$ - $C_7H_7$  ligands in the upper side of the  $Pd_{13}$  core are close to three  $\mu_4$ - $C_7H_7$  ligands in the lower side (Figure 1c). Therefore, the steric repulsion between the upper  $\mu_4$ - $C_7H_7$  and the lower  $\mu_4$ - $C_7H_7$  is large (Scheme S6b), and the  $\mu_4$ - $C_7H_7$  ligands are not located at the best position for interacting with the  $Pd_{13}$  core to decrease the  $E_{\text{int}}$  value. In the anticuboctahedral  $Pd_{13}$  core, the  $Pd_3$  planes in the upper part of the  $Pd_{13}$  core is connected with the  $Pd_4$  planes in the lower part. In **Anti- $\mu_3,4$** , therefore, three  $\mu_3$ - $C_7H_7$  ligands in the upper side are distant from three  $\mu_4$ - $C_7H_7$  ligands in the lower side and the steric repulsion between them is small (Scheme S6c). Therefore, the  $\mu_4$ - $C_7H_7$  ligands are located at the best position to interact with the anticuboctahedral  $Pd_{13}$  core in **Anti- $\mu_3,4$**  without any interference. Consistent with this understanding, the  $R(Pd^C-X)$  distance of the  $\mu_4$ - $C_7H_7$  in **Anti- $\mu_4$**  is longer than in **Anti- $\mu_3,4$** , as mentioned above. Thus, it is likely concluded that the  $\mu_4$ -coordination bond of the  $C_7H_7$  ligand is weaker in **Anti- $\mu_4$**  than in **Anti- $\mu_3,4$** .

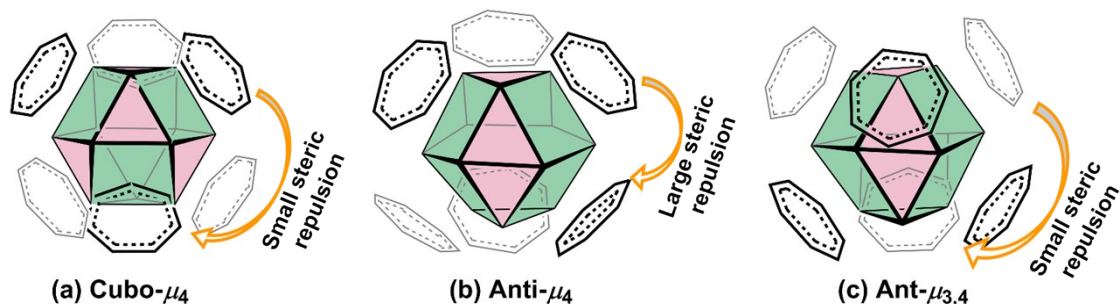

**Scheme S6.** Schematical picture showing the positions of  $\mu_3$ - and  $\mu_4$ - $C_7H_7$  ligands.

## 9.2 Comparison between **Ih- $\mu_3$** and **Cubo- $\mu_3$**

**Ih- $\mu_3$**  is more stable than **Cubo- $\mu_3$**  despite that both have six  $\mu_3$ - $C_7H_7$  ligands. All the  $C_7H_7$  ligands have the moderately smaller positive charges ( $+0.211 e \sim +0.214 e$ ) in **Ih- $\mu_3$**  than those ( $+0.225 e$ ) in **Cubo- $\mu_3$**  (Figure 2). Also, the  $R(Pd^C-X)$  distance (2.202 Å; Table 1) of **Ih- $\mu_3$**  is moderately shorter than that (2.242 Å) of **Cubo- $\mu_3$**  (Table 1). These features suggest that the  $\mu_3$ -coordination bond of  $C_7H_7$  is stronger in **Ih- $\mu_3$**  than in **Cubo- $\mu_3$** . One factor is the interaction structure. The Type-A coordination bond of  $\mu_3$ - $C_7H_7$  in **Ih- $\mu_3$**  is stronger than in **Cubo- $\mu_3$**  because three C=C double bonds interact with three Pd atoms in the Type A  $\mu_3$ -coordination bond of **Ih- $\mu_3$**  but one C=C double bond coordinates to one Pd atom and three C atoms coordinates to two Pd atoms through a  $\pi$ -allyl type interaction in the  $\mu_3$ -coordination bond of **Cubo- $\mu_3$** . The other factor is the HOMO energy of the  $Pd_{13}$  core: The HOMO of the icosahedral  $Pd_{13}$  cluster exists at a higher energy ( $-4.61 eV$ ; Scheme S2 in the ESI) than that ( $-4.85 eV$ ; Scheme 3) of the cuboctahedral  $Pd_{13}$  cluster.<sup>21</sup> Consequently, the icosahedral  $Pd_{13}$  core forms the stronger CT to the  $\mu_3$ - $(C_7H_7)_6$  ligand shell than does the cuboctahedral  $Pd_{13}$  core. Because of these two factors, the  $E_{int}$  value is larger (more negative) in **Ih- $\mu_3$**  than in **Cubo- $\mu_3$** . In addition, the icosahedral  $Pd_{13}$  core and the  $[(C_7H_7)_6]^{2+}$  shell in **Ih- $\mu_3$**  are more stable than the cuboctahedral  $Pd_{13}$  core and the  $[(C_7H_7)_6]^{2+}$  shell in **Cubo- $\mu_3$** , respectively (Table 2). Therefore, **Ih- $\mu_3$**  is more stable than **Cubo- $\mu_3$** .

## References

- S1. M. Teramoto, K. Iwata, H. Yamaura, K. Kurashima, K. Miyazawa, Y. Kurashige, K. Yamamoto and T. Murahashi, *J. Am. Chem. Soc.*, 2018, **140**, 12682–12686.
- S2. J. Wei, S. Kahlal, J.-F. Halet and J.-Y. Saillard, *J. Cluster Science*, 2019, **30**, 1227-1233).
- S3. Here, we compared HOMO energy using the optimized Pd<sub>13</sub> bare cluster because the Pd<sub>13</sub> cores in **Cubo-μ4** and **Anti-μ4** distort and the HOMO energy is influenced by the distortion. In other words, the discussion is presented on the intrinsic ability of HOMO of the Pd<sub>13</sub> cluster for the CT from the Pd<sub>13</sub> core to the [(C<sub>7</sub>H<sub>7</sub>)<sub>6</sub>]<sup>2+</sup> ligand shell.

## Cartesian coordinate

### Cubo- $\mu$ 4

|    |             |             |             |
|----|-------------|-------------|-------------|
| Pd | 7.04727300  | 8.55225900  | 35.17618500 |
| Pd | 7.41182200  | 6.11795100  | 34.09106400 |
| Pd | 8.42256900  | 7.23592900  | 31.76405100 |
| Pd | 8.02436400  | 9.80280200  | 32.90126000 |
| Pd | 4.85422200  | 6.76944200  | 34.93665200 |
| Pd | 5.51319200  | 10.47297400 | 33.88367500 |
| C  | 9.17192100  | 8.67761800  | 35.57866200 |
| H  | 9.15635100  | 9.11552200  | 36.57579000 |
| C  | 9.17844700  | 7.25167500  | 35.55477000 |
| H  | 9.02118400  | 6.77608400  | 36.51883400 |
| C  | 9.55490000  | 6.36762500  | 34.50213200 |
| H  | 9.76767300  | 5.34848000  | 34.82141900 |
| C  | 10.10286500 | 6.70452200  | 33.21563000 |
| H  | 10.56866300 | 5.87025700  | 32.69672000 |
| C  | 10.35316400 | 7.98709700  | 32.66890000 |
| H  | 10.99946700 | 8.00518900  | 31.79431800 |
| C  | 10.14245700 | 9.27863400  | 33.26774000 |
| H  | 10.67189100 | 10.09079900 | 32.77367800 |
| C  | 9.61466200  | 9.58110600  | 34.54812800 |
| H  | 9.75639700  | 10.60465700 | 34.88545900 |
| C  | 6.01363100  | 9.99784400  | 36.63379000 |
| H  | 6.84425100  | 10.58374900 | 37.01882300 |
| C  | 5.94452900  | 8.65748100  | 37.08997400 |
| H  | 6.70482100  | 8.36658100  | 37.81201600 |
| C  | 4.84821900  | 7.73107400  | 36.98255000 |
| H  | 4.94144500  | 6.85905100  | 37.62581700 |
| C  | 3.56694600  | 7.93462800  | 36.41398200 |
| H  | 2.81440000  | 7.19134400  | 36.66589600 |
| C  | 3.04176700  | 9.11579700  | 35.78215600 |
| H  | 1.95441400  | 9.14496900  | 35.73090300 |
| C  | 3.67676400  | 10.38145400 | 35.62207400 |
| H  | 3.01439100  | 11.19477800 | 35.33900900 |

|    |            |             |             |
|----|------------|-------------|-------------|
| C  | 5.00292400 | 10.77766000 | 35.96647100 |
| H  | 5.14881300 | 11.85404000 | 36.04645300 |
| C  | 7.04574300 | 3.89759300  | 33.89708300 |
| H  | 8.05038200 | 3.50752400  | 34.04359800 |
| C  | 6.38230900 | 4.32828200  | 35.07204000 |
| H  | 6.95118000 | 4.24215100  | 35.99463400 |
| C  | 4.98368300 | 4.60371300  | 35.26469900 |
| H  | 4.66798100 | 4.58755800  | 36.30679200 |
| C  | 3.92354200 | 4.46112000  | 34.32249900 |
| H  | 2.92471000 | 4.48926400  | 34.74899700 |
| C  | 3.98048500 | 4.09098500  | 32.94664600 |
| H  | 3.03638500 | 3.74274100  | 32.53002300 |
| C  | 5.13787000 | 3.70199100  | 32.18224900 |
| H  | 4.90415700 | 3.21990500  | 31.23643400 |
| C  | 6.48876900 | 3.60860400  | 32.60162300 |
| H  | 7.14328000 | 3.02838500  | 31.95440200 |
| Pd | 4.81738800 | 7.46000400  | 30.23626500 |
| Pd | 4.45283900 | 9.89431200  | 31.32138200 |
| Pd | 3.44209000 | 8.77633100  | 33.64839300 |
| Pd | 3.84029200 | 6.20945800  | 32.51118800 |
| Pd | 7.01044000 | 9.24282100  | 30.47579300 |
| Pd | 6.35146500 | 5.53928700  | 31.52877400 |
| C  | 2.69274100 | 7.33464400  | 29.83378400 |
| H  | 2.70831200 | 6.89674000  | 28.83665600 |
| C  | 2.68621500 | 8.76058700  | 29.85767600 |
| H  | 2.84348100 | 9.23617800  | 28.89361100 |
| C  | 2.30976100 | 9.64463800  | 30.91031400 |
| H  | 2.09699000 | 10.66378300 | 30.59102600 |
| C  | 1.76179500 | 9.30774200  | 32.19681500 |
| H  | 1.29599700 | 10.14200700 | 32.71572500 |
| C  | 1.51149300 | 8.02516600  | 32.74354500 |
| H  | 0.86519000 | 8.00707500  | 33.61812600 |
| C  | 1.72220000 | 6.73362900  | 32.14470500 |
| H  | 1.19276500 | 5.92146400  | 32.63876700 |
| C  | 2.24999700 | 6.43115700  | 30.86431800 |
| H  | 2.10826200 | 5.40760600  | 30.52698600 |



|    |            |             |             |
|----|------------|-------------|-------------|
| C  | 5.85102900 | 6.01441500  | 28.77866100 |
| H  | 5.02040800 | 5.42850700  | 28.39363200 |
| C  | 5.92012700 | 7.35477700  | 28.32247400 |
| H  | 5.15983400 | 7.64567500  | 27.60043400 |
| C  | 7.01643600 | 8.28118700  | 28.42989500 |
| H  | 6.92320600 | 9.15320900  | 27.78662800 |
| C  | 8.29771100 | 8.07763500  | 28.99846100 |
| H  | 9.05025500 | 8.82092000  | 28.74654300 |
| C  | 8.82289300 | 6.89646900  | 29.63028700 |
| H  | 9.91024600 | 6.86729900  | 29.68153900 |
| C  | 8.18789900 | 5.63081000  | 29.79037200 |
| H  | 8.85027400 | 4.81748700  | 30.07343800 |
| C  | 6.86173900 | 5.23460100  | 29.44597900 |
| H  | 6.71585200 | 4.15822000  | 29.36599800 |
| C  | 4.81891500 | 12.11467000 | 31.51536800 |
| H  | 3.81427600 | 12.50473900 | 31.36885500 |
| C  | 5.48234500 | 11.68398300 | 30.34040800 |
| H  | 4.91347200 | 11.77011600 | 29.41781600 |
| C  | 6.88097000 | 11.40855000 | 30.14774600 |
| H  | 7.19666900 | 11.42470700 | 29.10565100 |
| C  | 7.94111400 | 11.55114100 | 31.08994300 |
| H  | 8.93994400 | 11.52299700 | 30.66344200 |
| C  | 7.88417400 | 11.92127400 | 32.46579700 |
| H  | 8.82827500 | 12.26951700 | 32.88241700 |
| C  | 6.72679100 | 12.31026700 | 33.23019700 |
| H  | 6.96050800 | 12.79235200 | 34.17601200 |
| C  | 5.37589200 | 12.40365800 | 32.81082600 |
| H  | 4.72138400 | 12.98387700 | 33.45804800 |
| Pd | 5.93233000 | 8.00613100  | 32.70622400 |

**Cubo- $\mu$ 3**

|           |                    |                    |                    |
|-----------|--------------------|--------------------|--------------------|
| <b>Pd</b> | <b>-0.26152000</b> | <b>-1.50393600</b> | <b>2.27771000</b>  |
| <b>Pd</b> | <b>-1.80323400</b> | <b>-2.14302700</b> | <b>0.03350200</b>  |
| <b>Pd</b> | <b>-2.75729900</b> | <b>0.49021700</b>  | <b>-0.03717800</b> |
| <b>Pd</b> | <b>-1.17344200</b> | <b>0.97539600</b>  | <b>2.27766600</b>  |
| <b>Pd</b> | <b>0.95424600</b>  | <b>-2.63258400</b> | <b>-0.03654100</b> |
| <b>Pd</b> | <b>1.42940500</b>  | <b>0.52507900</b>  | <b>2.27919700</b>  |
| <b>C</b>  | <b>0.87366000</b>  | <b>-3.64963200</b> | <b>3.25742500</b>  |
| <b>H</b>  | <b>1.57104000</b>  | <b>-3.48125800</b> | <b>4.07407900</b>  |
| <b>C</b>  | <b>1.39651100</b>  | <b>-4.25055000</b> | <b>2.11886800</b>  |
| <b>H</b>  | <b>2.45105300</b>  | <b>-4.51131500</b> | <b>2.15720100</b>  |
| <b>C</b>  | <b>0.71873100</b>  | <b>-4.65582300</b> | <b>0.93720900</b>  |
| <b>H</b>  | <b>1.27410200</b>  | <b>-5.34121300</b> | <b>0.30260000</b>  |
| <b>C</b>  | <b>-0.63796800</b> | <b>-4.50115100</b> | <b>0.58787400</b>  |
| <b>H</b>  | <b>-0.95861400</b> | <b>-5.04632700</b> | <b>-0.29564500</b> |
| <b>C</b>  | <b>-1.69212100</b> | <b>-3.85350800</b> | <b>1.31590500</b>  |
| <b>H</b>  | <b>-2.68281800</b> | <b>-4.25550400</b> | <b>1.11813400</b>  |
| <b>C</b>  | <b>-1.56599300</b> | <b>-3.24640400</b> | <b>2.62755200</b>  |
| <b>H</b>  | <b>-2.51597400</b> | <b>-2.95896800</b> | <b>3.07005400</b>  |
| <b>C</b>  | <b>-0.46625700</b> | <b>-3.26026200</b> | <b>3.51986400</b>  |
| <b>H</b>  | <b>-0.68092700</b> | <b>-2.95213500</b> | <b>4.54102100</b>  |
| <b>C</b>  | <b>3.05148400</b>  | <b>1.22565500</b>  | <b>3.52300800</b>  |
| <b>H</b>  | <b>2.89045100</b>  | <b>0.88565900</b>  | <b>4.54405500</b>  |
| <b>C</b>  | <b>3.58998700</b>  | <b>0.26599200</b>  | <b>2.63095900</b>  |
| <b>H</b>  | <b>3.81437600</b>  | <b>-0.70149900</b> | <b>3.07365300</b>  |
| <b>C</b>  | <b>4.18018700</b>  | <b>0.46046800</b>  | <b>1.31967100</b>  |
| <b>H</b>  | <b>5.02325200</b>  | <b>-0.19693300</b> | <b>1.12181900</b>  |
| <b>C</b>  | <b>4.21542300</b>  | <b>1.69696400</b>  | <b>0.59219100</b>  |
| <b>H</b>  | <b>4.84834900</b>  | <b>1.69178700</b>  | <b>-0.29134200</b> |
| <b>C</b>  | <b>3.67144400</b>  | <b>2.95041000</b>  | <b>0.94310700</b>  |
| <b>H</b>  | <b>3.98916200</b>  | <b>3.77427200</b>  | <b>0.30981300</b>  |
| <b>C</b>  | <b>2.98040900</b>  | <b>3.33551100</b>  | <b>2.12362800</b>  |
| <b>H</b>  | <b>2.67788400</b>  | <b>4.37834700</b>  | <b>2.16554300</b>  |
| <b>C</b>  | <b>2.71999600</b>  | <b>2.58042200</b>  | <b>3.26106600</b>  |
| <b>H</b>  | <b>2.22465800</b>  | <b>3.09895200</b>  | <b>4.07789100</b>  |

|    |             |             |             |
|----|-------------|-------------|-------------|
| C  | 2.49159200  | -3.38863900 | -1.31670900 |
| H  | 2.34357600  | -4.44765000 | -1.11901000 |
| C  | 3.57818500  | -2.80070200 | -0.58832500 |
| H  | 3.88834000  | -3.35084900 | 0.29510700  |
| C  | 4.39304700  | -1.70420700 | -0.93622700 |
| H  | 5.26361900  | -1.56706400 | -0.30106300 |
| C  | 4.38373400  | -0.91316800 | -2.11802600 |
| H  | 5.13792700  | -0.13201500 | -2.15481700 |
| C  | 3.60098700  | -1.06503100 | -3.25630400 |
| H  | 3.80429600  | -0.37724700 | -4.07267300 |
| C  | 2.59243300  | -2.02980900 | -3.51872200 |
| H  | 2.21830500  | -2.06061200 | -4.53972600 |
| C  | 2.03068400  | -2.97535300 | -2.62676200 |
| H  | 1.30615500  | -3.65391500 | -3.06978900 |
| Pd | 0.26132700  | 1.50395700  | -2.27774400 |
| Pd | 1.80322400  | 2.14304300  | -0.03381200 |
| Pd | 2.75739900  | -0.49013100 | 0.03677500  |
| Pd | 1.17347700  | -0.97548000 | -2.27772100 |
| Pd | -0.95418800 | 2.63275200  | 0.03698000  |
| Pd | -1.42945800 | -0.52517800 | -2.27941700 |
| C  | -0.87400100 | 3.64981900  | -3.25703800 |
| H  | -1.57152400 | 3.48148700  | -4.07357800 |
| C  | -1.39663900 | 4.25071400  | -2.11838000 |
| H  | -2.45118200 | 4.51150000  | -2.15652800 |
| C  | -0.71866400 | 4.65593800  | -0.93681000 |
| H  | -1.27392200 | 5.34132600  | -0.30210100 |
| C  | 0.63810400  | 4.50125600  | -0.58772400 |
| H  | 0.95891900  | 5.04639200  | 0.29575900  |
| C  | 1.69211900  | 3.85363200  | -1.31597600 |
| H  | 2.68287500  | 4.25554800  | -1.11831800 |
| C  | 1.56576000  | 3.24656000  | -2.62761800 |
| H  | 2.51567000  | 2.95913600  | -3.07029100 |
| C  | 0.46585800  | 3.26042200  | -3.51972300 |
| H  | 0.68035100  | 2.95234500  | -4.54093400 |
| C  | -3.05168800 | -1.22591000 | -3.52295500 |
| H  | -2.89074500 | -0.88592200 | -4.54401900 |

|    |             |             |             |
|----|-------------|-------------|-------------|
| C  | -3.59019800 | -0.26625400 | -2.63089700 |
| H  | -3.81467500 | 0.70121500  | -3.07360300 |
| C  | -4.18027600 | -0.46069200 | -1.31954700 |
| H  | -5.02332400 | 0.19672400  | -1.12163200 |
| C  | -4.21543100 | -1.69717800 | -0.59202500 |
| H  | -4.84824200 | -1.69197000 | 0.29159000  |
| C  | -3.67155800 | -2.95064000 | -0.94301800 |
| H  | -3.98920700 | -3.77451100 | -0.30970300 |
| C  | -2.98057400 | -3.33574400 | -2.12357100 |
| H  | -2.67806700 | -4.37858800 | -2.16548800 |
| C  | -2.72019700 | -2.58067300 | -3.26102800 |
| H  | -2.22490900 | -3.09922200 | -4.07787200 |
| C  | -2.49132400 | 3.38884400  | 1.31740300  |
| H  | -2.34322800 | 4.44787900  | 1.11989700  |
| C  | -3.57790100 | 2.80112300  | 0.58887700  |
| H  | -3.88807600 | 3.35151900  | -0.29439100 |
| C  | -4.39264400 | 1.70440400  | 0.93636300  |
| H  | -5.26319300 | 1.56743000  | 0.30113000  |
| C  | -4.38328000 | 0.91303500  | 2.11792500  |
| H  | -5.13740200 | 0.13180400  | 2.15447800  |
| C  | -3.60061500 | 1.06466800  | 3.25631000  |
| H  | -3.80392600 | 0.37663900  | 4.07246900  |
| C  | -2.59218300 | 2.02947900  | 3.51909200  |
| H  | -2.21809000 | 2.06000400  | 4.54011400  |
| C  | -2.03041400 | 2.97523300  | 2.62736900  |
| H  | -1.30585400 | 3.65365900  | 3.07056800  |
| Pd | -0.00000100 | 0.00001800  | -0.00007400 |

**Anti- $\mu$ 4**

|    |             |             |             |
|----|-------------|-------------|-------------|
| Pd | -1.66035600 | 2.44814200  | -0.21456600 |
| Pd | -2.67997100 | -0.10227600 | -0.70003500 |
| Pd | -1.53054000 | -1.27995100 | 1.72647100  |
| Pd | -1.19114200 | 1.33356900  | 2.19162600  |
| Pd | -0.89426700 | 1.04806500  | -2.44956000 |
| Pd | 0.98124300  | 2.47550100  | -0.74291700 |
| C  | -4.30391200 | 1.74281800  | 0.66432700  |
| H  | -4.65656700 | 2.53659500  | 0.00990900  |
| C  | -4.58977000 | 0.41094800  | 0.20363900  |
| H  | -5.29185100 | 0.35464400  | -0.62620200 |
| C  | -4.26374300 | -0.80223000 | 0.82873600  |
| H  | -4.71808600 | -1.69175500 | 0.40205700  |
| C  | -3.64419400 | -1.02541900 | 2.12471400  |
| H  | -3.85822200 | -2.01056600 | 2.53527900  |
| C  | -3.32259400 | -0.04798300 | 3.10231900  |
| H  | -3.08845300 | -0.43611600 | 4.09091600  |
| C  | -3.36761700 | 1.35954500  | 3.00240100  |
| H  | -3.23808000 | 1.89178500  | 3.94189100  |
| C  | -3.85899600 | 2.13463200  | 1.91454200  |
| H  | -3.89643000 | 3.20472500  | 2.09600800  |
| C  | 0.82818000  | 2.48594600  | -3.68249400 |
| H  | 0.08078600  | 3.09900600  | -4.18158600 |
| C  | 1.00834800  | 1.21254300  | -4.18958800 |
| H  | 0.39257300  | 0.97291700  | -5.05158800 |
| C  | 1.97127600  | 0.18587100  | -3.83470900 |
| H  | 2.09168200  | -0.58503600 | -4.59844600 |
| C  | 3.14058700  | 0.38176700  | -3.03777400 |
| H  | 3.91829200  | -0.36404700 | -3.18361700 |
| C  | 3.49279500  | 1.47407600  | -2.21018000 |
| H  | 4.54733200  | 1.52676800  | -1.94888300 |
| C  | 2.78712500  | 2.73587100  | -2.04727500 |
| H  | 3.37799700  | 3.50584200  | -1.55611200 |
| C  | 1.62645800  | 3.18765900  | -2.70332100 |
| H  | 1.44368000  | 4.25948000  | -2.66495500 |

|    |             |             |             |
|----|-------------|-------------|-------------|
| C  | -3.51084900 | -1.47929600 | -2.18324900 |
| H  | -4.56326300 | -1.53295100 | -1.91375200 |
| C  | -3.16579300 | -0.38634900 | -3.01278200 |
| H  | -3.94572900 | 0.35811600  | -3.15362000 |
| C  | -2.00189400 | -0.18824000 | -3.81756900 |
| H  | -2.12946600 | 0.58200200  | -4.58089400 |
| C  | -1.04094900 | -1.21414200 | -4.18025100 |
| H  | -0.43215900 | -0.97367800 | -5.04696200 |
| C  | -0.85631100 | -2.48789700 | -3.67571700 |
| H  | -0.11229800 | -3.10007100 | -4.18085600 |
| C  | -1.64623200 | -3.19041100 | -2.69052500 |
| H  | -1.46139300 | -4.26189600 | -2.65282200 |
| C  | -2.80230800 | -2.74013800 | -2.02528500 |
| H  | -3.38846200 | -3.51088400 | -1.52966900 |
| Pd | 1.65598900  | -2.44929000 | -0.22757500 |
| Pd | 1.54501000  | 1.28046200  | 1.71483000  |
| Pd | 2.67334800  | 0.10172000  | -0.71732300 |
| Pd | 0.87320500  | -1.04561500 | -2.45432100 |
| Pd | 1.21135300  | -1.33227800 | 2.18204800  |
| Pd | -0.98837000 | -2.47558500 | -0.73489100 |
| C  | 3.39181000  | -1.36144000 | 2.97655100  |
| H  | 3.26998400  | -1.89493800 | 3.91635400  |
| C  | 3.34712500  | 0.04572500  | 3.07877200  |
| H  | 3.12048900  | 0.43253200  | 4.06962600  |
| C  | 3.66025900  | 1.02480700  | 2.09978200  |
| H  | 3.87750500  | 2.00935000  | 2.51013600  |
| C  | 4.26916700  | 0.80356000  | 0.79852200  |
| H  | 4.71830500  | 1.69413700  | 0.36844900  |
| C  | 4.59171600  | -0.40862400 | 0.16965200  |
| H  | 5.28695900  | -0.35053700 | -0.66579300 |
| C  | 4.31249400  | -1.74136900 | 0.63179400  |
| H  | 4.66078400  | -2.53396800 | -0.02635600 |
| C  | 3.87600400  | -2.13510300 | 1.88401300  |
| H  | 3.91490500  | -3.20541200 | 2.06380900  |
| C  | 0.29386700  | -4.50914100 | 0.24626800  |
| H  | 0.58596000  | -5.13819800 | -0.59101300 |

|    |             |             |             |
|----|-------------|-------------|-------------|
| C  | 1.34395200  | -4.11543300 | 1.10818600  |
| H  | 2.28782200  | -4.63154300 | 0.92758000  |
| C  | 1.21607300  | -3.59165400 | 2.46505400  |
| H  | 2.09414600  | -3.74486200 | 3.08392200  |
| C  | 0.07790500  | -3.18496900 | 3.15663000  |
| H  | 0.20917500  | -2.98133600 | 4.21632800  |
| C  | -1.29757400 | -3.23251000 | 2.71891200  |
| H  | -2.01977300 | -3.11196600 | 3.52471600  |
| C  | -1.80597300 | -3.78136700 | 1.52944900  |
| H  | -2.88507500 | -3.90851100 | 1.49437600  |
| C  | -1.11412200 | -4.31707600 | 0.39188900  |
| H  | -1.72710000 | -4.95029000 | -0.24686400 |
| C  | 1.12155000  | 4.31743400  | 0.38339900  |
| H  | 1.73066500  | 4.94963300  | -0.26001000 |
| C  | 1.82093700  | 3.78099700  | 1.51604800  |
| H  | 2.89987200  | 3.90744300  | 1.47354400  |
| C  | 1.32038600  | 3.23298100  | 2.70915500  |
| H  | 2.04790000  | 3.11241500  | 3.51015300  |
| C  | -0.05224500 | 3.18502800  | 3.15589900  |
| H  | -0.17640300 | 2.98281300  | 4.21671400  |
| C  | -1.19496100 | 3.59151200  | 2.47141100  |
| H  | -2.06873900 | 3.74567100  | 3.09609600  |
| C  | -1.33187100 | 4.11504700  | 1.11523800  |
| H  | -2.27643000 | 4.63238500  | 0.94152100  |
| C  | -0.28702800 | 4.50937600  | 0.24687400  |
| H  | -0.58469000 | 5.13821100  | -0.58860500 |
| Pd | -0.00142800 | 0.00096900  | -0.08816500 |

**Anti- $\mu$ 3;4**

|           |                    |                   |                    |
|-----------|--------------------|-------------------|--------------------|
| <b>Pd</b> | <b>0.40541900</b>  | <b>2.78979900</b> | <b>0.38219900</b>  |
| <b>Pd</b> | <b>0.83770500</b>  | <b>1.60137700</b> | <b>-2.04269500</b> |
| <b>Pd</b> | <b>-1.69607100</b> | <b>0.54709400</b> | <b>-2.27141500</b> |
| <b>Pd</b> | <b>-2.11971300</b> | <b>1.64314500</b> | <b>0.40513800</b>  |
| <b>Pd</b> | <b>2.58539700</b>  | <b>0.93251300</b> | <b>0.05688800</b>  |
| <b>Pd</b> | <b>0.92448900</b>  | <b>1.00546600</b> | <b>2.38505100</b>  |
| <b>C</b>  | <b>-0.78783100</b> | <b>4.40014200</b> | <b>-0.40795600</b> |
| <b>H</b>  | <b>-0.51203500</b> | <b>5.24489300</b> | <b>0.22154600</b>  |
| <b>C</b>  | <b>0.08351500</b>  | <b>4.15197300</b> | <b>-1.50441300</b> |
| <b>H</b>  | <b>0.96748700</b>  | <b>4.78194200</b> | <b>-1.54467400</b> |
| <b>C</b>  | <b>-0.17427900</b> | <b>3.41988700</b> | <b>-2.71410200</b> |
| <b>H</b>  | <b>0.47684100</b>  | <b>3.67954400</b> | <b>-3.54722300</b> |
| <b>C</b>  | <b>-1.37587000</b> | <b>2.75071000</b> | <b>-3.08412800</b> |
| <b>H</b>  | <b>-1.44183500</b> | <b>2.49909600</b> | <b>-4.14036200</b> |
| <b>C</b>  | <b>-2.57533300</b> | <b>2.55833100</b> | <b>-2.33465000</b> |
| <b>H</b>  | <b>-3.44665700</b> | <b>2.28445300</b> | <b>-2.92839800</b> |
| <b>C</b>  | <b>-2.90665200</b> | <b>3.08892000</b> | <b>-1.03350800</b> |
| <b>H</b>  | <b>-3.97394000</b> | <b>3.08893000</b> | <b>-0.82135400</b> |
| <b>C</b>  | <b>-2.11915700</b> | <b>3.91304600</b> | <b>-0.19030600</b> |
| <b>H</b>  | <b>-2.64349300</b> | <b>4.38819600</b> | <b>0.63442700</b>  |
| <b>C</b>  | <b>1.43607500</b>  | <b>3.80938400</b> | <b>2.33191100</b>  |
| <b>H</b>  | <b>0.77830400</b>  | <b>4.67349800</b> | <b>2.38333500</b>  |
| <b>C</b>  | <b>2.28170400</b>  | <b>3.74042300</b> | <b>1.18405800</b>  |
| <b>H</b>  | <b>2.30982400</b>  | <b>4.64005600</b> | <b>0.57398400</b>  |
| <b>C</b>  | <b>3.41265000</b>  | <b>2.86685200</b> | <b>0.99317400</b>  |
| <b>H</b>  | <b>4.12849200</b>  | <b>3.21230300</b> | <b>0.25146500</b>  |
| <b>C</b>  | <b>3.78485600</b>  | <b>1.73255100</b> | <b>1.73568300</b>  |
| <b>H</b>  | <b>4.77057900</b>  | <b>1.31870300</b> | <b>1.53286800</b>  |
| <b>C</b>  | <b>3.14595100</b>  | <b>1.22057500</b> | <b>2.93560100</b>  |
| <b>H</b>  | <b>3.60055800</b>  | <b>0.31509100</b> | <b>3.32796300</b>  |
| <b>C</b>  | <b>2.26883500</b>  | <b>1.88451400</b> | <b>3.81583600</b>  |
| <b>H</b>  | <b>2.15672900</b>  | <b>1.47220700</b> | <b>4.81530700</b>  |
| <b>C</b>  | <b>1.42964000</b>  | <b>2.99175900</b> | <b>3.48401300</b>  |
| <b>H</b>  | <b>0.73611600</b>  | <b>3.29560800</b> | <b>4.26402400</b>  |



|    |             |             |             |
|----|-------------|-------------|-------------|
| C  | 2.18452300  | 0.85934300  | -3.68964000 |
| H  | 1.85967500  | 1.48144100  | -4.52036100 |
| C  | 2.95975700  | 1.50760100  | -2.69544300 |
| H  | 3.14892300  | 2.56426700  | -2.87415800 |
| C  | 3.86224500  | 0.92533800  | -1.71082800 |
| H  | 4.64589300  | 1.60645800  | -1.38384500 |
| C  | 4.14874100  | -0.44004100 | -1.50011600 |
| H  | 5.02016900  | -0.64893200 | -0.88567000 |
| C  | 3.51333200  | -1.58587500 | -2.07107400 |
| H  | 4.08206200  | -2.50898800 | -1.97049600 |
| C  | 2.56967700  | -1.61681800 | -3.16031000 |
| H  | 2.44346100  | -2.60315700 | -3.60051600 |
| C  | 1.99786800  | -0.55320300 | -3.89368600 |
| H  | 1.54450700  | -0.82056100 | -4.84512800 |
| Pd | -0.43584500 | -2.64067500 | -0.11666200 |
| Pd | -1.50928900 | -0.16581000 | 2.33471600  |
| Pd | 0.70815700  | -1.61837500 | 2.09364200  |
| Pd | 2.21847700  | -1.71573400 | -0.35821700 |
| Pd | -2.68824600 | -0.93849000 | -0.15401600 |
| Pd | 0.44399300  | -1.12994600 | -2.38705900 |
| C  | 0.90495400  | -4.17806800 | 0.69630600  |
| H  | 0.34873400  | -4.99577900 | 0.23818300  |
| C  | 0.53677300  | -3.89769800 | 2.06523900  |
| H  | -0.42956400 | -4.29568800 | 2.36306700  |
| C  | 1.32549700  | -3.38474100 | 3.12816000  |
| H  | 0.87238300  | -3.45084900 | 4.11538400  |
| C  | 2.67477600  | -2.91288200 | 3.09500200  |
| H  | 3.05645000  | -2.54861100 | 4.04517700  |
| C  | 3.55272100  | -2.89840400 | 2.02518500  |
| H  | 4.54682000  | -2.50756200 | 2.22786300  |
| C  | 3.35523300  | -3.36419700 | 0.69704700  |
| H  | 4.26643400  | -3.46081200 | 0.11126500  |
| C  | 2.19762700  | -3.93272800 | 0.10612400  |
| H  | 2.35036600  | -4.42103300 | -0.85353600 |
| C  | -0.86285500 | -3.66182700 | -2.07512400 |
| H  | -0.19728500 | -4.52099000 | -2.07702100 |

|    |             |             |             |
|----|-------------|-------------|-------------|
| C  | -1.99823700 | -3.77352400 | -1.23171900 |
| H  | -2.08173200 | -4.69726800 | -0.66241700 |
| C  | -3.15435100 | -2.94103100 | -1.18209900 |
| H  | -3.97133300 | -3.34271500 | -0.58929100 |
| C  | -3.47842000 | -1.81344800 | -1.99198700 |
| H  | -4.52369200 | -1.51094400 | -1.98032600 |
| C  | -2.71587200 | -1.22176300 | -3.05415100 |
| H  | -3.31649900 | -0.61629600 | -3.73549600 |
| C  | -1.49734700 | -1.72027500 | -3.64279500 |
| H  | -1.28668100 | -1.33853200 | -4.63803300 |
| C  | -0.67759800 | -2.78855100 | -3.21682200 |
| H  | 0.00758100  | -3.17646800 | -3.96862800 |
| C  | -3.64286000 | -1.36081600 | 3.38060000  |
| H  | -3.50537800 | -2.12514200 | 4.14114600  |
| C  | -4.24568500 | -1.76704700 | 2.20196800  |
| H  | -4.51422000 | -2.81824700 | 2.13967600  |
| C  | -4.59499400 | -0.99256900 | 1.06269000  |
| H  | -5.26539300 | -1.49327400 | 0.36665200  |
| C  | -4.50989900 | 0.41482900  | 0.87425900  |
| H  | -5.09160300 | 0.81325300  | 0.04722600  |
| C  | -3.87402700 | 1.38504300  | 1.69922000  |
| H  | -4.22534400 | 2.40949300  | 1.57981100  |
| C  | -3.18002900 | 1.11744500  | 2.94587000  |
| H  | -2.84195800 | 2.01338000  | 3.46029000  |
| C  | -3.17117900 | -0.06731300 | 3.73209500  |
| H  | -2.81934200 | 0.05151400  | 4.75455600  |
| Pd | 0.00950000  | 0.01295000  | 0.04505200  |

**Ih-μ3**

|           |                    |                    |                    |
|-----------|--------------------|--------------------|--------------------|
| <b>Pd</b> | <b>0.00000000</b>  | <b>0.00000000</b>  | <b>0.04256900</b>  |
| <b>Pd</b> | <b>1.47122600</b>  | <b>2.34556800</b>  | <b>0.15751000</b>  |
| <b>Pd</b> | <b>-2.71537400</b> | <b>0.12305400</b>  | <b>0.11268200</b>  |
| <b>Pd</b> | <b>-0.99877100</b> | <b>2.06961400</b>  | <b>-1.42608200</b> |
| <b>Pd</b> | <b>1.33614800</b>  | <b>0.64157900</b>  | <b>-2.14918800</b> |
| <b>Pd</b> | <b>-1.33614800</b> | <b>-0.64157900</b> | <b>-2.14918800</b> |
| <b>Pd</b> | <b>0.99877100</b>  | <b>-2.06961400</b> | <b>-1.42608200</b> |
| <b>Pd</b> | <b>-1.47122600</b> | <b>-2.34556800</b> | <b>0.15751000</b>  |
| <b>Pd</b> | <b>2.71537400</b>  | <b>-0.12305400</b> | <b>0.11268200</b>  |
| <b>Pd</b> | <b>1.15489300</b>  | <b>-2.08696700</b> | <b>1.35956200</b>  |
| <b>Pd</b> | <b>-1.27044900</b> | <b>-0.56131200</b> | <b>2.33536000</b>  |
| <b>Pd</b> | <b>1.27044900</b>  | <b>0.56131200</b>  | <b>2.33536000</b>  |
| <b>Pd</b> | <b>-1.15489300</b> | <b>2.08696700</b>  | <b>1.35956200</b>  |
| <b>C</b>  | <b>-3.92342900</b> | <b>1.86690400</b>  | <b>0.94891400</b>  |
| <b>C</b>  | <b>-3.02366600</b> | <b>2.96673700</b>  | <b>0.68625500</b>  |
| <b>C</b>  | <b>-2.65976700</b> | <b>3.45891900</b>  | <b>-0.62261900</b> |
| <b>C</b>  | <b>-3.01631200</b> | <b>2.94967900</b>  | <b>-1.89386900</b> |
| <b>C</b>  | <b>-3.80467800</b> | <b>1.81526800</b>  | <b>-2.21683400</b> |
| <b>C</b>  | <b>-4.54258000</b> | <b>0.99833400</b>  | <b>-1.36484600</b> |
| <b>C</b>  | <b>-4.66926500</b> | <b>1.06951700</b>  | <b>0.05024400</b>  |
| <b>H</b>  | <b>-5.15544000</b> | <b>0.23752600</b>  | <b>-1.84201800</b> |
| <b>H</b>  | <b>-5.44537600</b> | <b>0.45148600</b>  | <b>0.49557100</b>  |
| <b>H</b>  | <b>-4.20512500</b> | <b>1.76459400</b>  | <b>1.99373500</b>  |
| <b>H</b>  | <b>-3.02543400</b> | <b>3.72963300</b>  | <b>1.46555600</b>  |
| <b>H</b>  | <b>-2.21742000</b> | <b>4.45205900</b>  | <b>-0.62203400</b> |
| <b>H</b>  | <b>-2.79910500</b> | <b>3.60116100</b>  | <b>-2.73697700</b> |
| <b>H</b>  | <b>-3.89811100</b> | <b>1.60729500</b>  | <b>-3.27951400</b> |
| <b>C</b>  | <b>-0.20597900</b> | <b>3.97188600</b>  | <b>2.15665100</b>  |
| <b>C</b>  | <b>-0.69798200</b> | <b>3.23238100</b>  | <b>3.25658500</b>  |
| <b>C</b>  | <b>0.00000000</b>  | <b>2.31604900</b>  | <b>4.08918000</b>  |
| <b>C</b>  | <b>1.34545500</b>  | <b>1.92816000</b>  | <b>4.03477200</b>  |
| <b>C</b>  | <b>2.32783600</b>  | <b>2.25556000</b>  | <b>3.03323900</b>  |
| <b>C</b>  | <b>2.26345700</b>  | <b>3.30543000</b>  | <b>2.04034500</b>  |
| <b>C</b>  | <b>1.14597400</b>  | <b>4.06307400</b>  | <b>1.65874600</b>  |

|   |             |             |             |
|---|-------------|-------------|-------------|
| H | 3.23157100  | 3.65806900  | 1.69015300  |
| H | 1.34753000  | 4.94555100  | 1.05844700  |
| H | -0.85717500 | 4.76800700  | 1.80289100  |
| H | -1.68980900 | 3.50587000  | 3.61051400  |
| H | -0.57563800 | 1.90877300  | 4.91603100  |
| H | 1.71212800  | 1.36225300  | 4.88902500  |
| H | 3.34140100  | 1.93583600  | 3.26616800  |
| C | 2.29558200  | 3.75478100  | -1.39653100 |
| C | 0.98534100  | 4.10673700  | -1.77766500 |
| C | 0.11916400  | 3.50028700  | -2.72559700 |
| C | 0.48484800  | 2.52175000  | -3.72040200 |
| C | 1.70909400  | 1.87971800  | -3.92822200 |
| C | 2.86687100  | 1.90989600  | -3.07036500 |
| C | 3.11804700  | 2.72953900  | -1.95646100 |
| H | 3.71322700  | 1.32355600  | -3.41949900 |
| H | 4.10745300  | 2.63572900  | -1.51671600 |
| H | 2.81712000  | 4.47046600  | -0.76501200 |
| H | 0.58240800  | 4.99273200  | -1.29326400 |
| H | -0.73417700 | 4.11429300  | -3.00383900 |
| H | -0.28040500 | 2.32176600  | -4.46665700 |
| H | 1.80719000  | 1.30212300  | -4.84359000 |
| C | -0.98534100 | -4.10673700 | -1.77766500 |
| C | -2.29558200 | -3.75478100 | -1.39653100 |
| C | -3.11804700 | -2.72953900 | -1.95646100 |
| C | -2.86687100 | -1.90989600 | -3.07036500 |
| C | -1.70909400 | -1.87971800 | -3.92822200 |
| C | -0.48484800 | -2.52175000 | -3.72040200 |
| C | -0.11916400 | -3.50028700 | -2.72559700 |
| H | 0.28040500  | -2.32176600 | -4.46665700 |
| H | 0.73417700  | -4.11429300 | -3.00383900 |
| H | -0.58240800 | -4.99273200 | -1.29326400 |
| H | -2.81712000 | -4.47046600 | -0.76501200 |
| H | -4.10745300 | -2.63572900 | -1.51671600 |
| H | -3.71322700 | -1.32355600 | -3.41949900 |
| H | -1.80719000 | -1.30212300 | -4.84359000 |
| C | 0.20597900  | -3.97188600 | 2.15665100  |

|   |             |             |             |
|---|-------------|-------------|-------------|
| C | 0.69798200  | -3.23238100 | 3.25658500  |
| C | 0.00000000  | -2.31604900 | 4.08918000  |
| C | -1.34545500 | -1.92816000 | 4.03477200  |
| C | -2.32783600 | -2.25556000 | 3.03323900  |
| C | -2.26345700 | -3.30543000 | 2.04034500  |
| C | -1.14597400 | -4.06307400 | 1.65874600  |
| H | -3.23157100 | -3.65806900 | 1.69015300  |
| H | -1.34753000 | -4.94555100 | 1.05844700  |
| H | 0.85717500  | -4.76800700 | 1.80289100  |
| H | 1.68980900  | -3.50587000 | 3.61051400  |
| H | 0.57563800  | -1.90877300 | 4.91603100  |
| H | -1.71212800 | -1.36225300 | 4.88902500  |
| H | -3.34140100 | -1.93583600 | 3.26616800  |
| C | 3.02366600  | -2.96673700 | 0.68625500  |
| C | 2.65976700  | -3.45891900 | -0.62261900 |
| C | 3.01631200  | -2.94967900 | -1.89386900 |
| C | 3.80467800  | -1.81526800 | -2.21683400 |
| C | 4.54258000  | -0.99833400 | -1.36484600 |
| C | 4.66926500  | -1.06951700 | 0.05024400  |
| C | 3.92342900  | -1.86690400 | 0.94891400  |
| H | 5.44537600  | -0.45148600 | 0.49557100  |
| H | 4.20512500  | -1.76459400 | 1.99373500  |
| H | 3.02543400  | -3.72963300 | 1.46555600  |
| H | 2.21742000  | -4.45205900 | -0.62203400 |
| H | 2.79910500  | -3.60116100 | -2.73697700 |
| H | 3.89811100  | -1.60729500 | -3.27951400 |
| H | 5.15544000  | -0.23752600 | -1.84201800 |
